# Supplementary material for: Genetic, environmental and intrinsic determinants of the human antibody epitope repertoire
Source: bioRxiv or medRxiv preprint supplement (doi:10.1101/2021.12.07.471553), 2021-12-08

**A** Lactococcus phage (YP\_009222335.1 hypothetical protein LfeInf\_097)  
*PYMNNQGQPLFNTPLQFISAGQTFPVELKSTQGSDRHWSSTANALNQIALPPMS*

DR15  
 (HLA-DRB1\*1501)

Core: ISAGQTFPV  
 %Rank\_EL = 7.70

$\Delta G_{(kcal/mol)} = -9.3$   
 $Kd_{(M)} \text{ at } 25.0 \text{ } ^\circ\text{C} = 1.6 \times 10^{-7}$

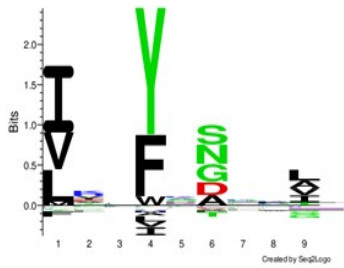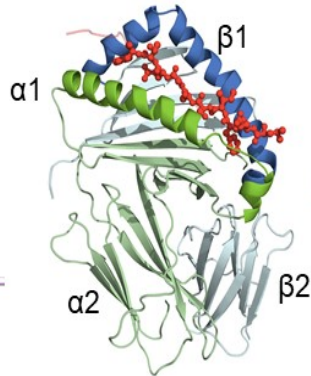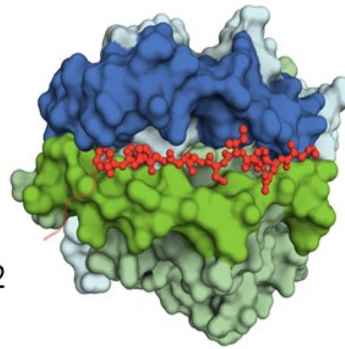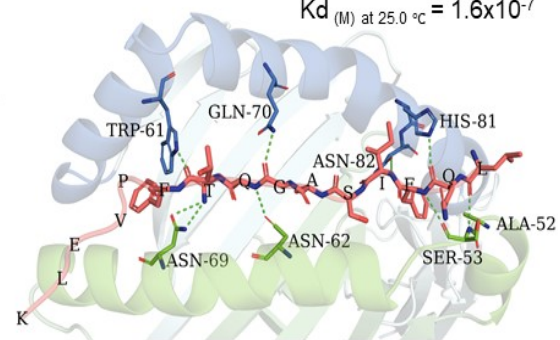

**B** Human mastadenovirus minor core protein  
*TMQLMVPKRQKLEDVLEHMKVDPSVQPDVKVRPIKKVAPGLGVQTVDIQIPVQ TALGETMEIQT*

DR4  
 (HLA-DRB1\*0401)

$\Delta G_{(kcal/mol)} = -9.4$   
 $Kd_{(M)} \text{ at } 25.0 \text{ } ^\circ\text{C} = 1.2 \times 10^{-7}$

Core: LEHMKVDPS  
 %Rank\_EL = 1.15

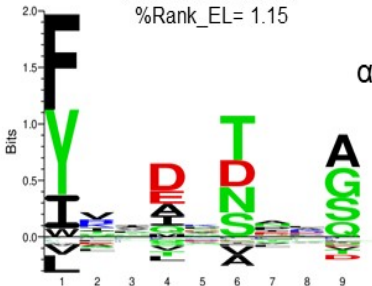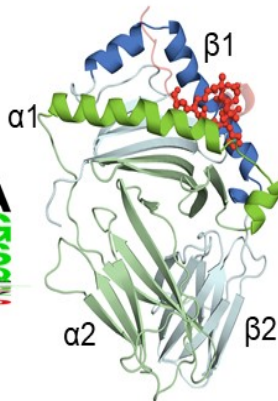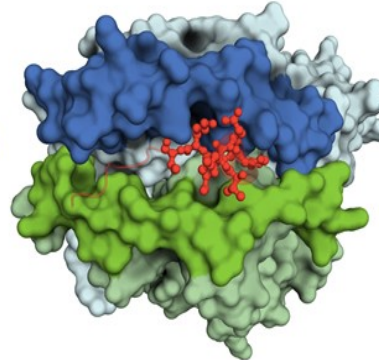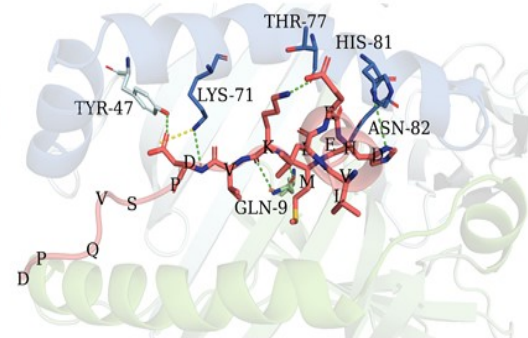

DQ8  
 (HLA-DQA1\*0301-DQB1\*0302)

$\Delta G_{(kcal/mol)} = -9.4$   
 $Kd_{(M)} \text{ at } 25.0 \text{ } ^\circ\text{C} = 1.3 \times 10^{-7}$

Core: LEHMKVDPS  
 %Rank\_EL = 0.86

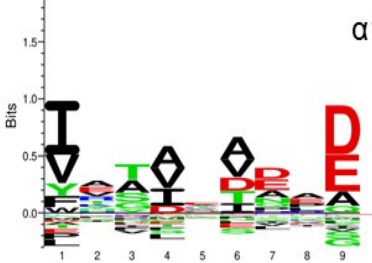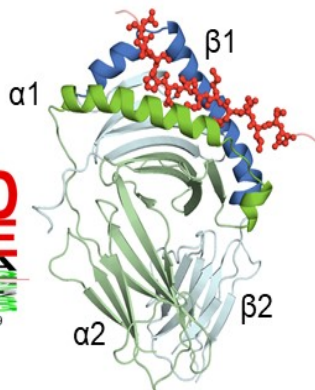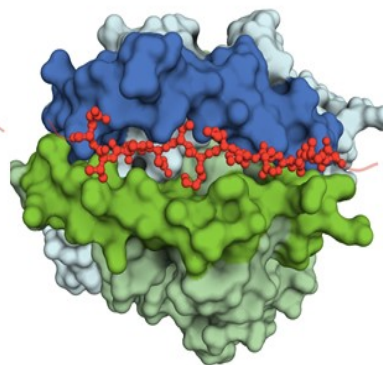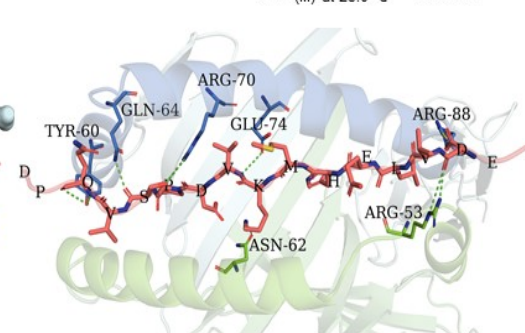

Supplement: Supplementary file [file media-2.pdf]
